# Supplementary material for: Quantitative Structure–Activity Relationships for the Flavonoid-Mediated Inhibition of P-Glycoprotein in KB/MDR1 Cells
Source: MDPI journal article supplement (doi:10.3390/molecules24091661), 2019-04-27
Supplement: s1 [file s1]

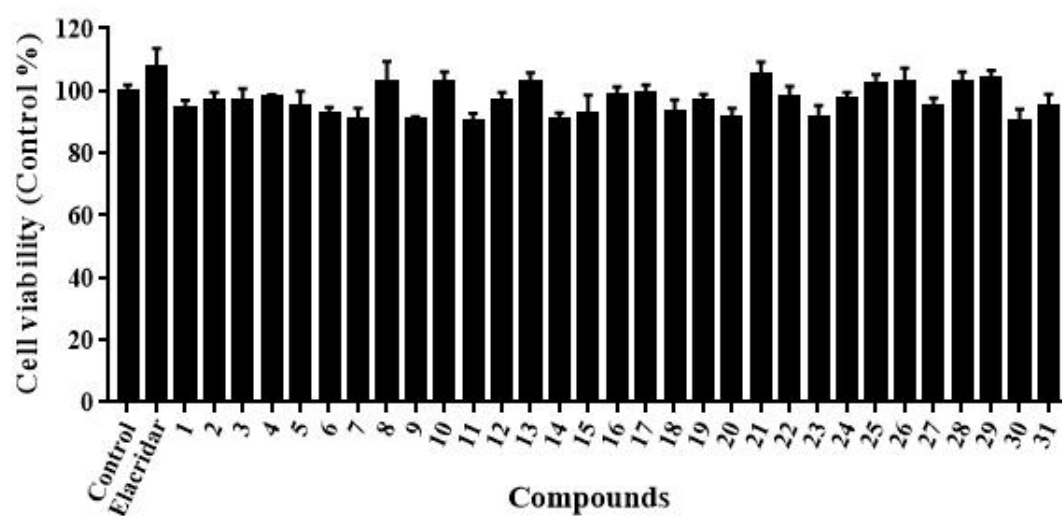

Figure 1S. The cytotoxicity of flavonoids and elacridar in KB/MDR1 cells.

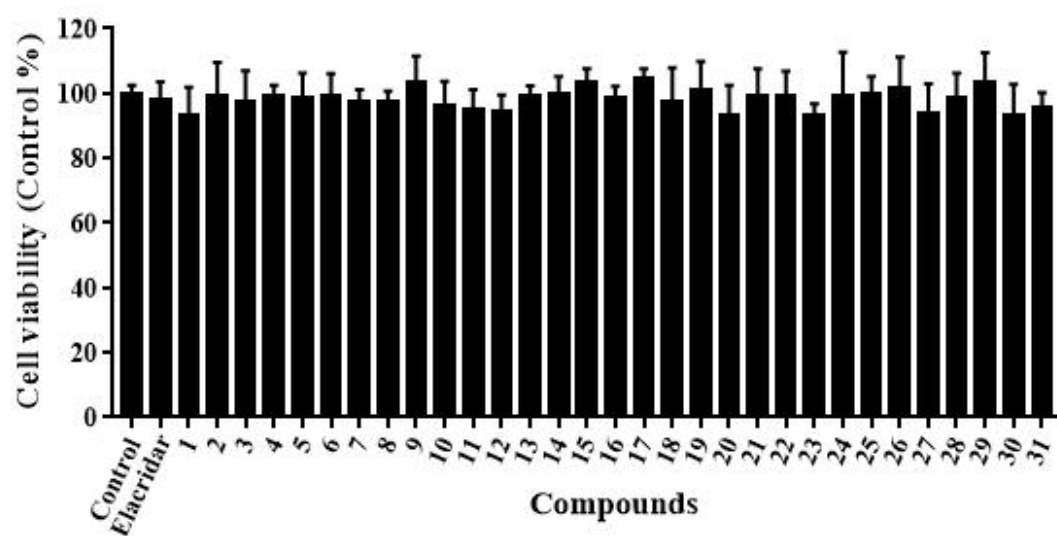

Figure 2S. The cytotoxicity of flavonoids and elacridar in KB cells.
